# Supplementary material for: Genomic Heterogeneity and the Small Renal Mass
Source: Oxford University Press journal article supplement (doi:10.1158/1078-0432.ccr-18-0214), 2018-05-14
Supplement: 10780432ccr180214-sup-195755_2_supp_4685352_p7122p.docx [file 10780432ccr180214-sup-195755_2_supp_4685352_p7122p.docx]

**Supplementary Figure S4: Minimal Correlation of Gene Expression and subclonal CNV events.**

Minimal correlation of gene expression was decreasing with increasing in subclonal CNV events. (R2=0.431, p<0.001)

**
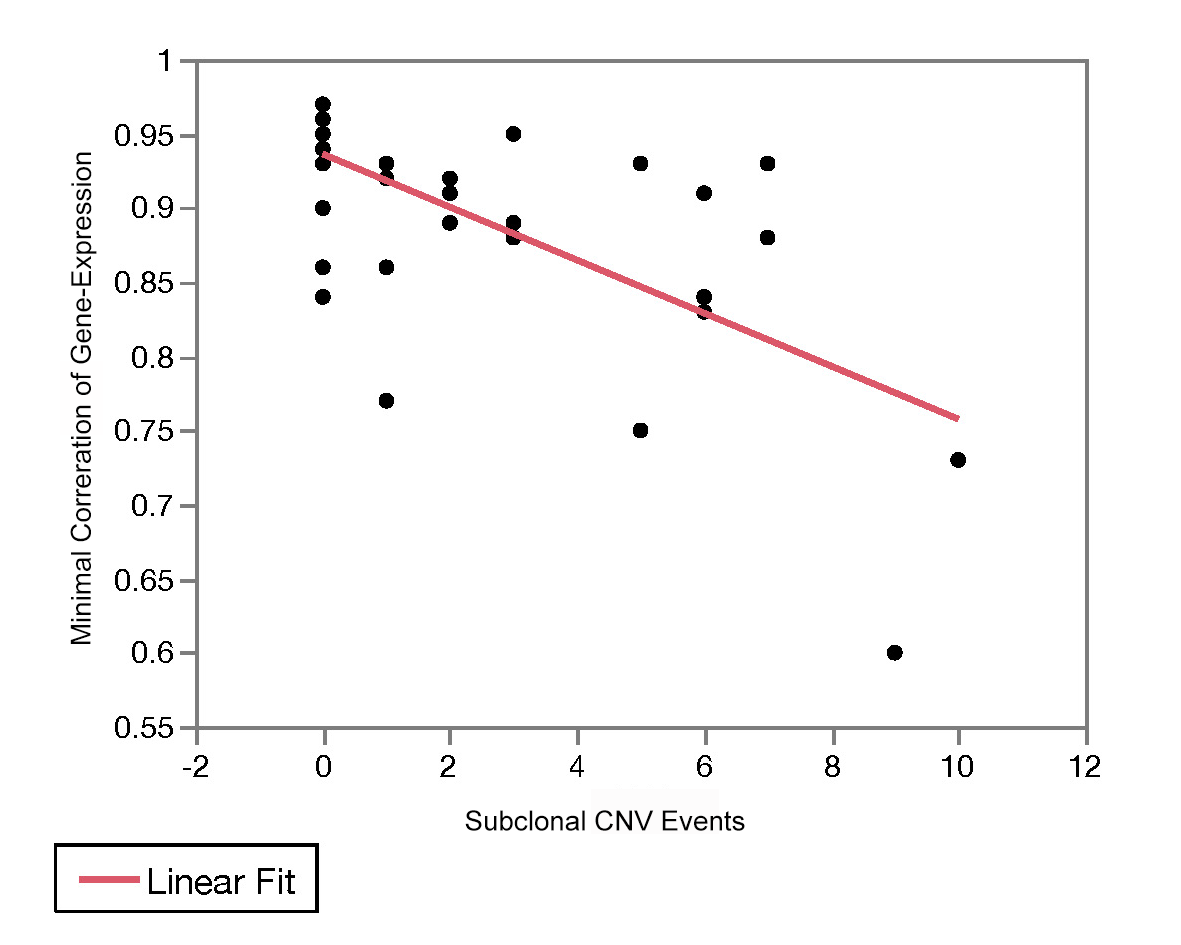
**
