# Supplementary material for: Genomic Heterogeneity and the Small Renal Mass
Source: Oxford University Press journal article supplement (doi:10.1158/1078-0432.ccr-18-0214), 2018-05-14
Supplement: 10780432ccr180214-sup-195755_2_supp_4685357_p7122p.docx [file 10780432ccr180214-sup-195755_2_supp_4685357_p7122p.docx]

**Supplementary Figure S2: PCA Map of Small (circle) and Large (triangle) tumors**

PCA map showed within-sample variation in a) ccA/ccB gene set and b) CCP gene set.

Each color of dot represents individual tumor. Small tumors were indicated as round dot. Large tumors were indicated as triangular dot.

**
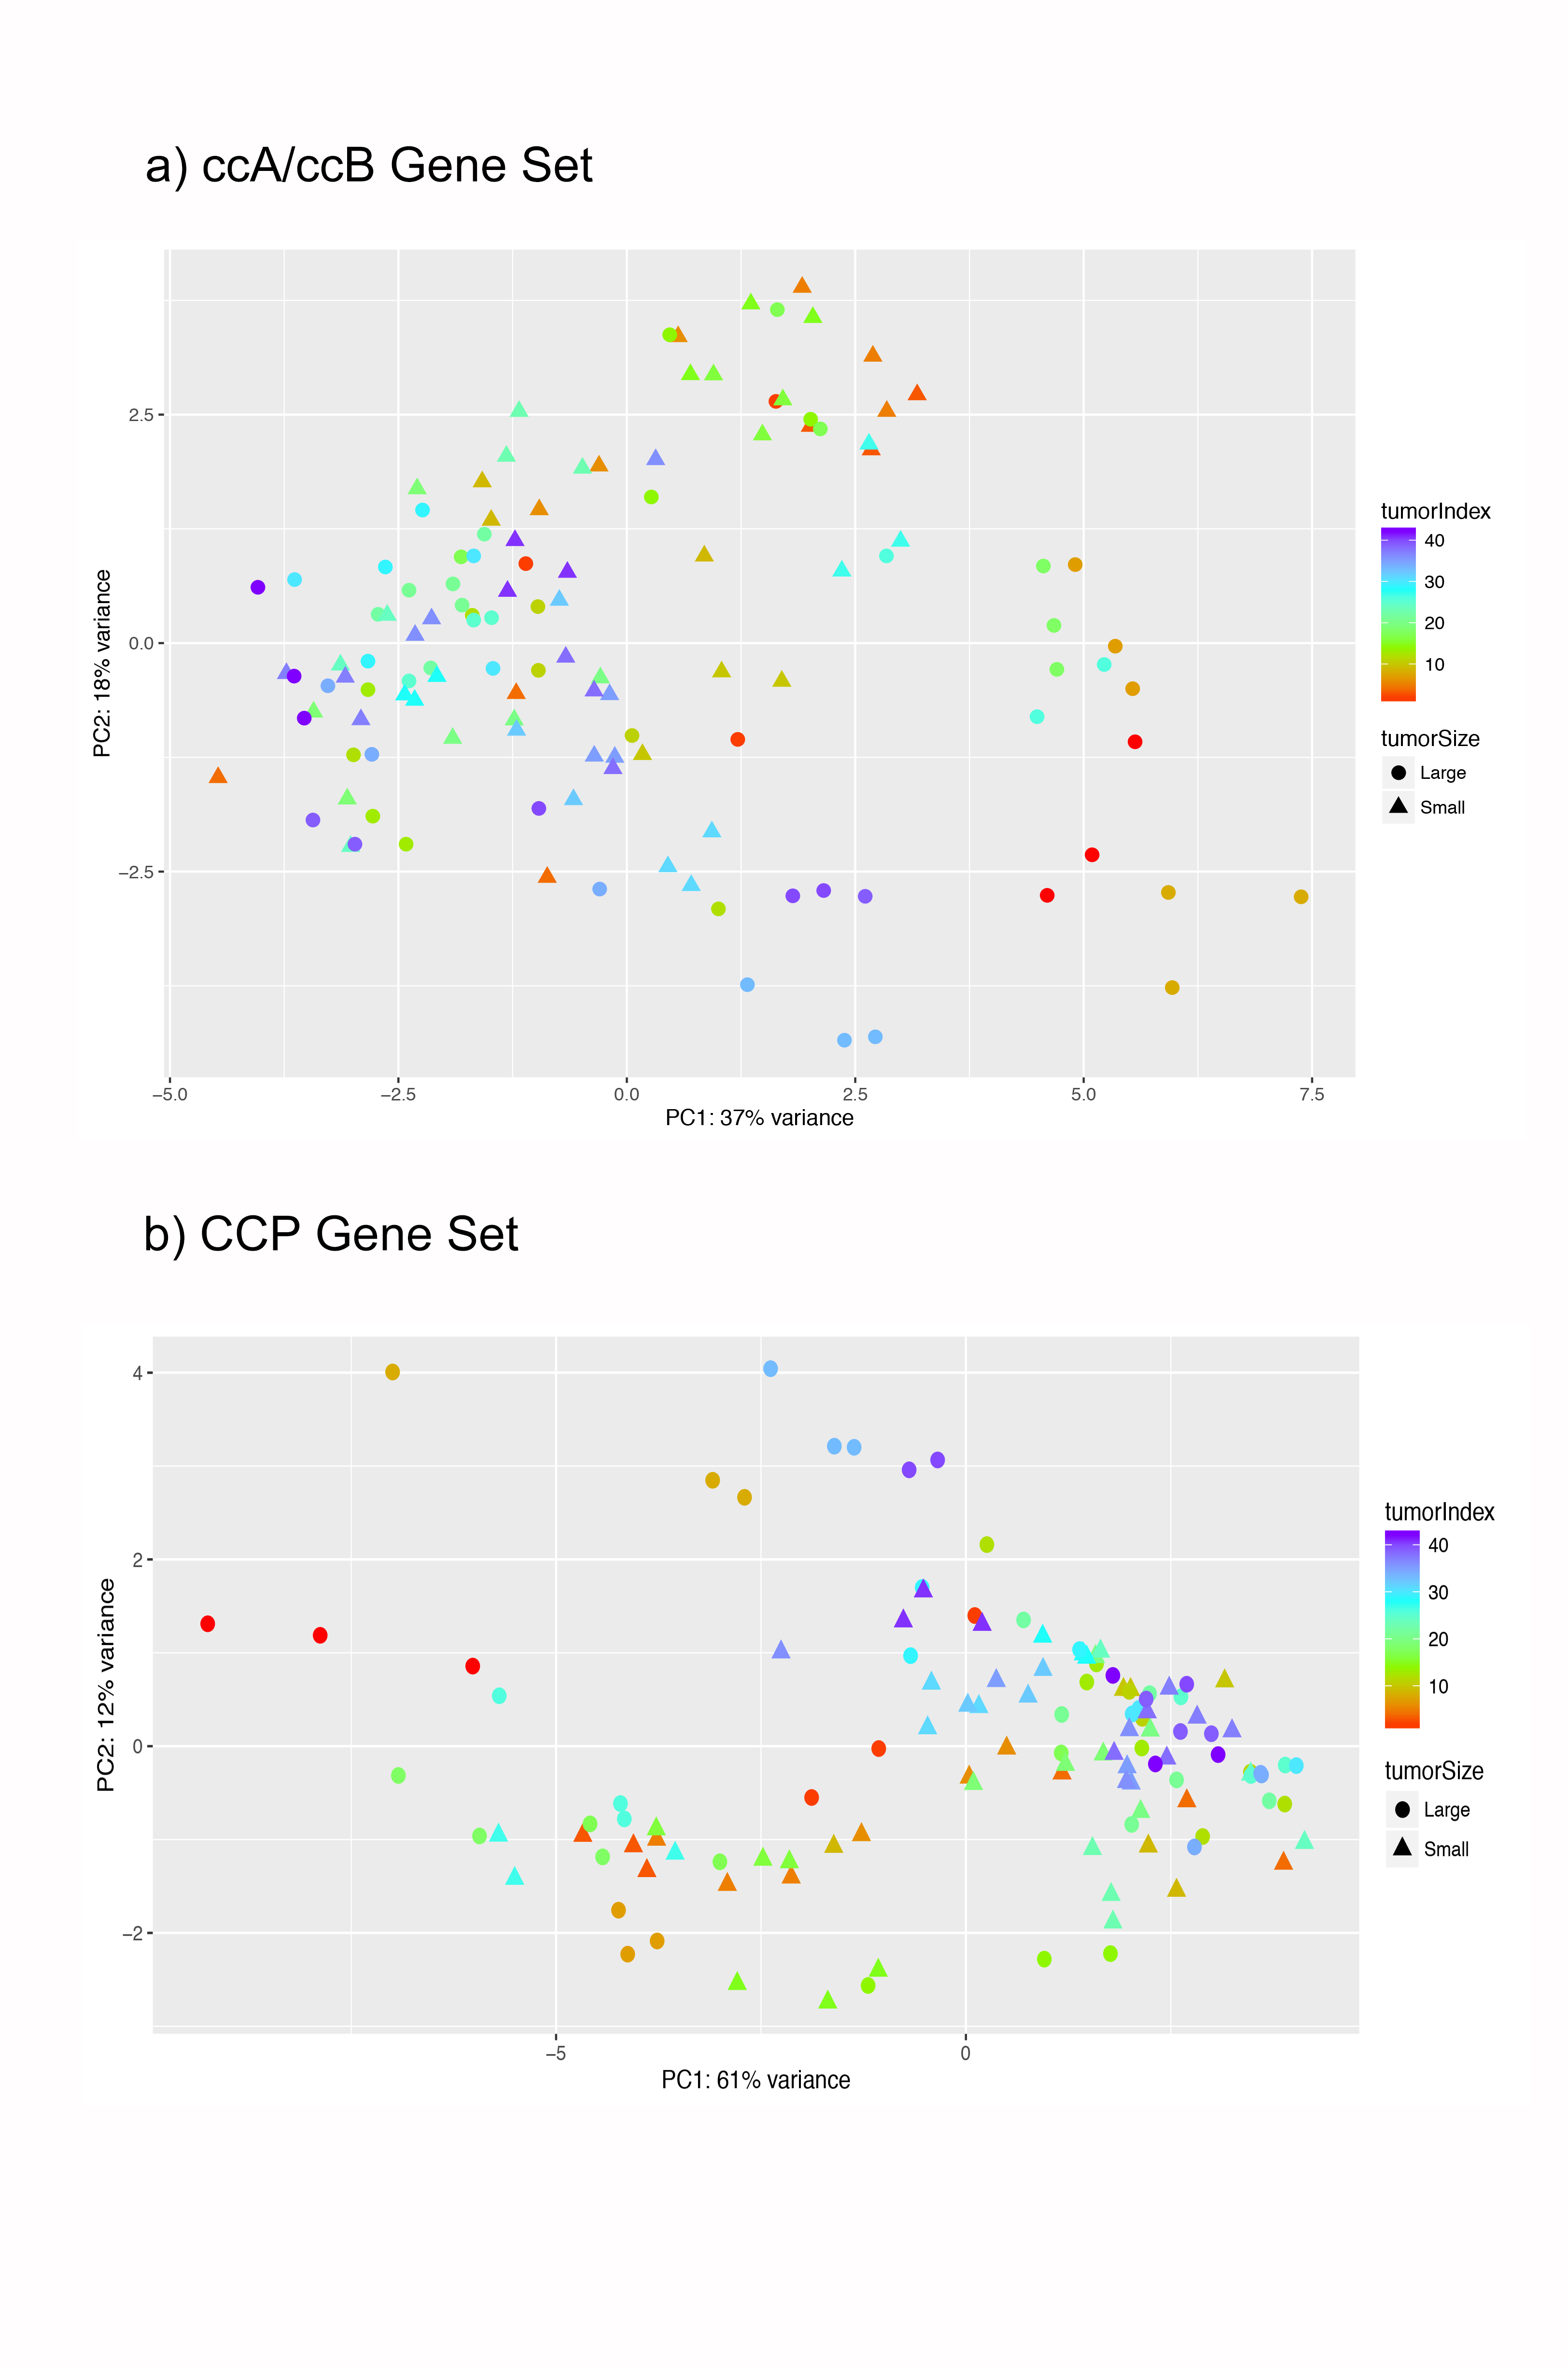
**
