# Supplementary material for: Genomic Heterogeneity and the Small Renal Mass
Source: Oxford University Press journal article supplement (doi:10.1158/1078-0432.ccr-18-0214), 2018-05-14
Supplement: 10780432ccr180214-sup-195755_2_supp_4685358_p7122p.docx [file 10780432ccr180214-sup-195755_2_supp_4685358_p7122p.docx]

**Supplementary Figure S3: Heat Map of Cohort**

Figure S3 shows heat map of samples-sample distance for entire gene set.

**
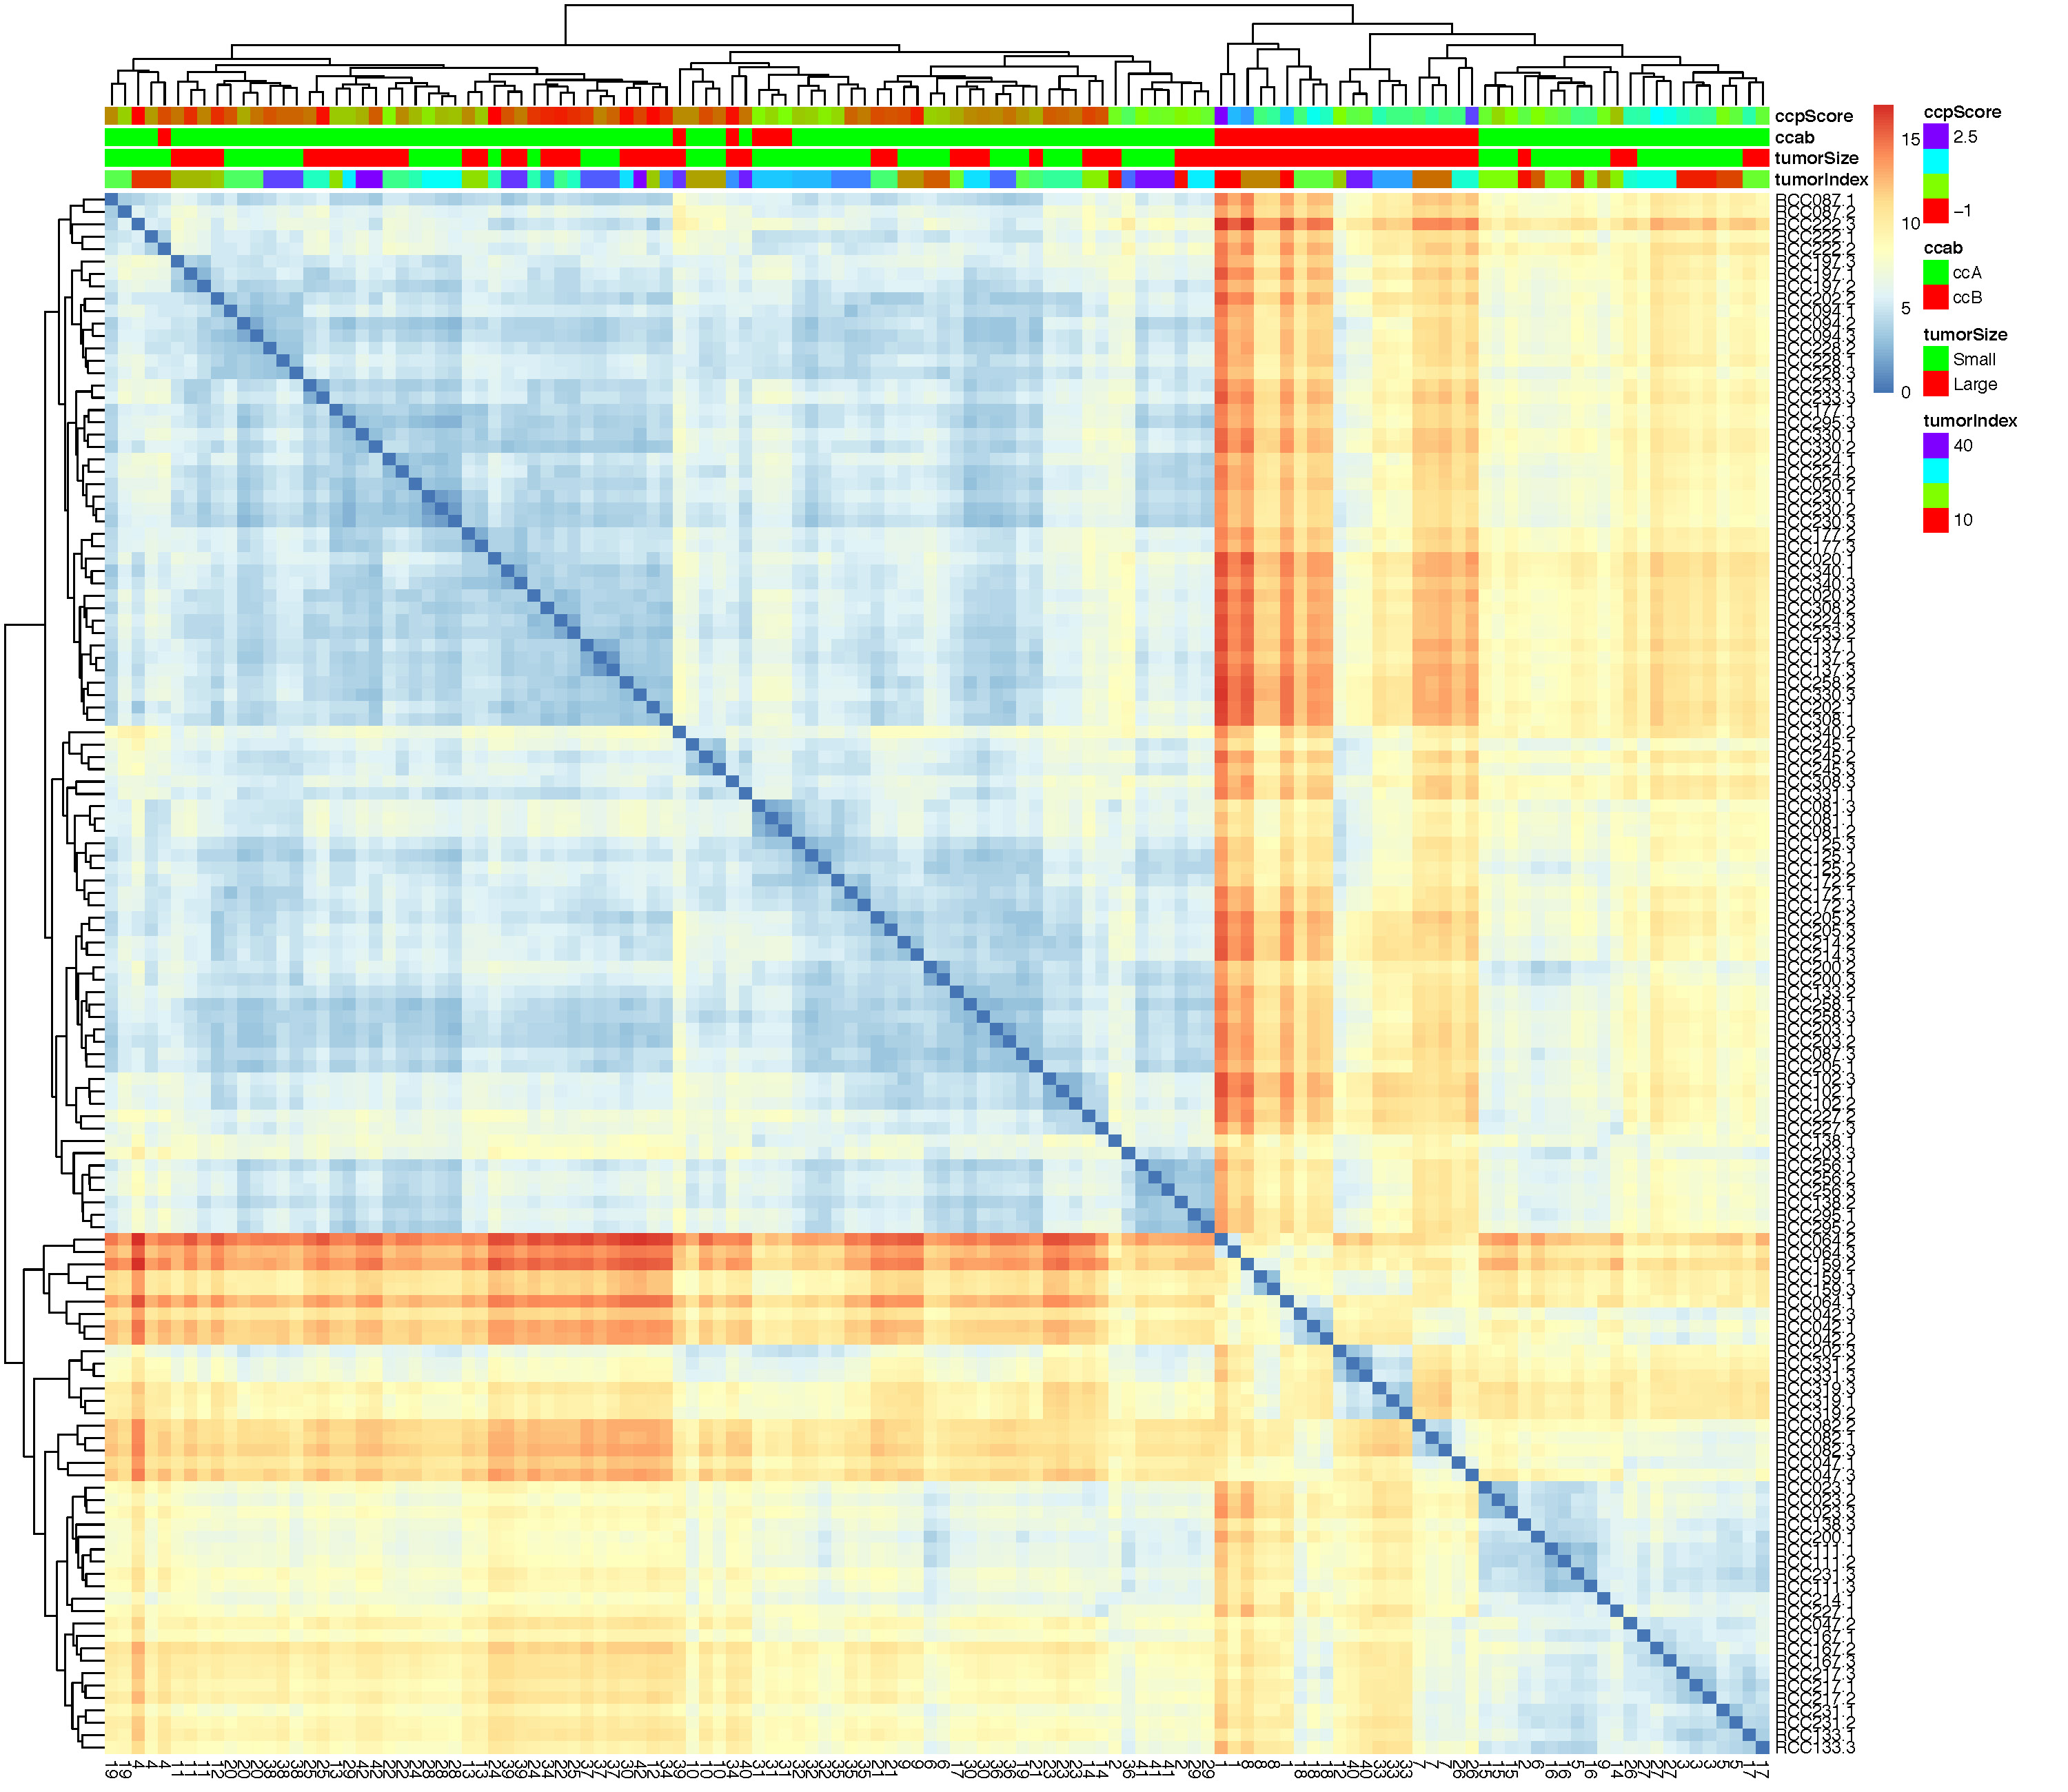
**
